# Supplementary material for: Fabrication of a silver octahedral nanoparticle-containing polycaprolactone nanocomposite for antibacterial bone scaffolds
Source: Royal Society of Chemistry journal article supplement (doi:10.1039/c6ra26063b), 2017-01-01
Supplement: c6ra26063b1.pdf [file c6ra26063b1.pdf]

## **Supplementary information for Fabrication of Silver Octahedral Nanoparticle- containing Polycaprolactone Nanocomposite for Antibacterial Bone Scaffolds**

Yu Gao <sup>a,d</sup>, Ammar Mansoor Hassanbhai <sup>b,d</sup>, Jing Lim <sup>b,d</sup>, Lianhui Wang <sup>a\*</sup>, Chenjie Xu <sup>b,c\*</sup>

<sup>a</sup> Key Laboratory for Organic Electronics and Information Displays & Institute of Advanced Materials (IAM), Jiangsu National Synergistic Innovation Center for Advanced Materials (SICAM), Nanjing University of Posts & Telecommunications, 9 Wenyuan Road, Nanjing 210023, China

<sup>b</sup> School of Chemical and Biomedical Engineering, Nanyang Technological University, 70 Nanyang Drive, Singapore 637457

<sup>c</sup> NTU-Northwestern Institute for Nanomedicine, Nanyang Technological University, 50 Nanyang Avenue, Singapore 639798

<sup>d</sup> These author contributed equally to this work

\*Corresponding to [iamlhwan@njupt.edu.cn](mailto:iamlhwang@njupt.edu.cn) or [cjxu@ntu.edu.sg](mailto:cjxu@ntu.edu.sg)

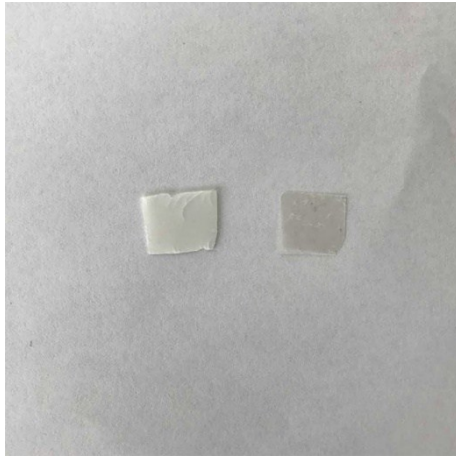

**Figure S1.** Image showing the pure PCL film (left) with white color and Ag-PCL film with even light brown color.

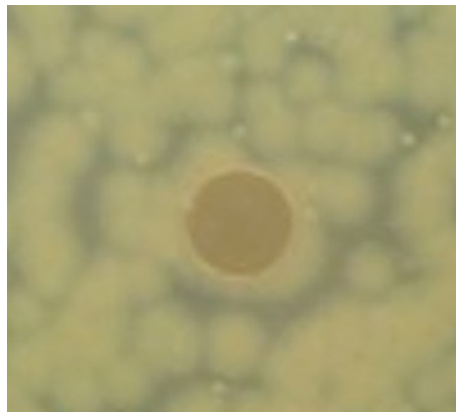

**Figure S2.** Image showing the antibacterial effect of Ag-PCL film scaffold placed on the surface of the inoculated Mueller-Hinton Agar plate, cultured with *pseudomonas aeruginosa* for 4 hours.

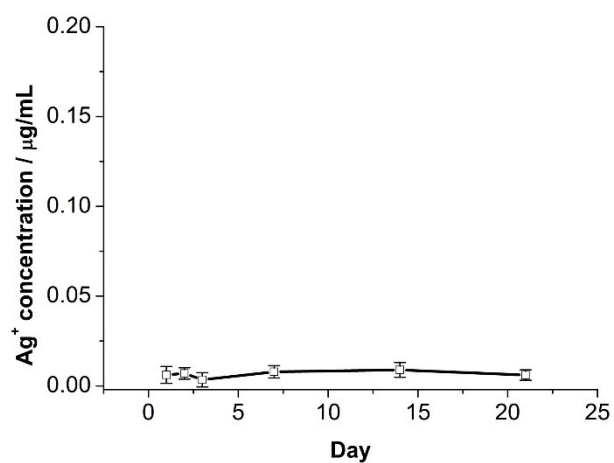

**Figure S3.** Release profile of silver ions from Ag-PCL composite film in distilled water for 21 days.

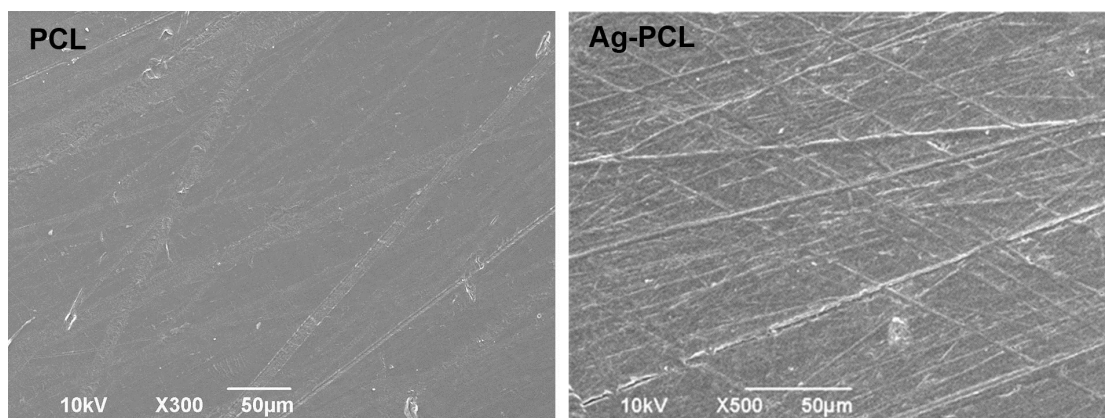

**Figure S4.** SEM images of plane PCL (left) and Ag-PCL (right) film.

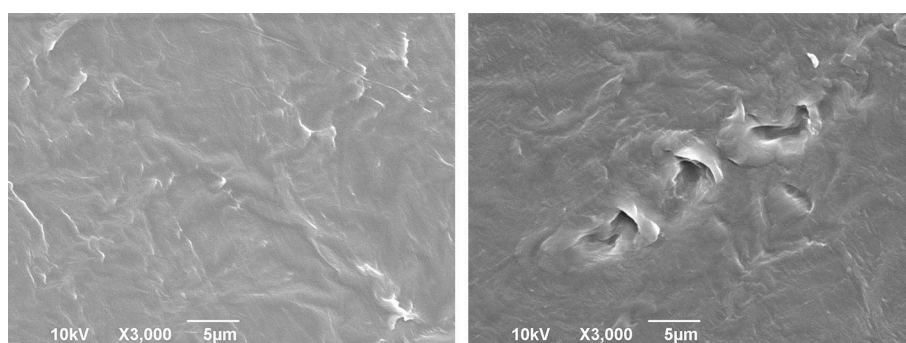

**Figure S5.** SEM images of PCL film before incubation with medium (left) and after incubation with medium for 7 days (right).
